# Supplementary material for: Lifestyle interventions in the management of systemic sclerosis: a systematic review of the literature
Source: PubMed Central journal article supplement (PMC11001494; doi:10.1093/rap/rkae037), 2024-03-09
Supplement: rkae037_supplementary_data.pdf [file rkae037_supplementary_data.pdf]

# Supplementary Table S1

## Study characteristics

| Author, Year                          | Category            | Participants                                              | Intervention/management strategy <sup>a</sup>                                                                                                                                                                            | Comparator                   | Outcome(s) <sup>b</sup>                               | SD&OA <sup>c</sup> | Oxford LoE <sup>d</sup> |
|---------------------------------------|---------------------|-----------------------------------------------------------|--------------------------------------------------------------------------------------------------------------------------------------------------------------------------------------------------------------------------|------------------------------|-------------------------------------------------------|--------------------|-------------------------|
| <b>Physical activity and exercise</b> |                     |                                                           |                                                                                                                                                                                                                          |                              |                                                       |                    |                         |
| Stefanantoni, 2016 (1)                | Exercise (hand)     | Intervention: 15<br>Control: 16                           | P: Hand stretching exercise and weekly phone call with occupational therapist, with specific timetable for when to conduct exercise<br><br>C: Hand stretching exercise and weekly phone call with occupational therapist | Other SSc patients           | COPM                                                  | 11; I              | 2                       |
| Rannou, 2017 (2)                      | Exercise (multiple) | Intervention: 110<br>Control: 108                         | P: Personalized physical therapy session with physiotherapist and occupational therapist<br><br>C: Usual care                                                                                                            | Other SSc patients           | CHFS; HAQ-DI; Oral aperture                           | 11; R              | 2                       |
| Gregory, 2019 (3)                     | Exercise (hand)     | Intervention: 17<br>Control: 19                           | P: Paraffin bath and hand exercises<br><br>C: Hand exercises without wax bath                                                                                                                                            | Other SSc patients           | HAMIS                                                 | 11; I              | 2                       |
| Filippetti, 2020 (4)                  | Exercise (general)  | Intervention: 22<br>Control: 22                           | P: Home-based aerobic exercise (stationary bike), muscular endurance training (upper limbs) and stretching (hands)<br><br>C: Usual care                                                                                  | Other SSc patients           | 6MWD; HAQ-DI; SF-36                                   | 11; I              | 2                       |
| Mugii, 2006 (5)                       | Exercise (hand)     | Intervention: 45<br>Control: 21 healthy controls          | P: Self-administrated stretching<br><br>C: No intervention                                                                                                                                                               | Healthy controls             | ROM                                                   | 10; I              | 3                       |
| Oliveira, 2009 (6)                    | Exercise (general)  | Intervention: 7<br>Control: 7                             | P: Aerobic exercise programme<br><br>C: Aerobic exercise programme                                                                                                                                                       | Healthy controls             | V0 <sub>2</sub> max                                   | 10; I              | 3                       |
| Piga, 2014 (7)                        | Exercise (hand)     | Intervention: 20 (10 with RA)<br>Control: 20 (10 with RA) | P: Stretching and mobility exercises at home using a newly developed telemedicine system<br><br>C: Home kinesiotherapy protocol                                                                                          | SSc patients and RA-patients | HAMIS                                                 | 11; W              | 3                       |
| Lima, 2015 (8)                        | Exercise (general)  | Intervention: 20<br>Control: 20                           | P: Muscle strength<br><br>C: No intervention                                                                                                                                                                             | Healthy controls             | HAQ-DI                                                | 1; R               | 3                       |
| Azar, 2018 (9)                        | Exercise (general)  | Intervention: 389<br>Control: 363                         | P: Exercise habits<br><br>C: No intervention                                                                                                                                                                             | Other SSc patients           | PROMIS                                                | 5; I               | 3                       |
| Mitropoulos, 2018 (10)                | Exercise (general)  | Intervention 1: 11<br>Intervention 2: 11<br>Control: 12   | P: Intervention 1: HIIT (cycling) twice a week for 12 weeks<br><br>Intervention 2: HIIT (arm cranking) twice a week for 12 weeks<br><br>C: No training protocol                                                          | Other SSc patients           | CVC                                                   | 11; W              | 3                       |
| Mitropoulos, 2019 (11)                | Exercise (general)  | Intervention: 16<br>Control: 16                           | P: Combined programme with HIIT and resistance training, twice weekly for 12 weeks<br><br>C: No intervention                                                                                                             | Other SSc patients           | CVC                                                   | 11; W              | 3                       |
| Cetin, 2020 (12)                      | Exercise (general)  | Intervention: 14<br>Control: 14                           | P: Tai Chi<br><br>C: Home exercise                                                                                                                                                                                       | Other SSc patients           | Berg Balance Scale; Fatigue Severity Scale; Pittsburg | 11; W              | 3                       |

| Author, Year             | Category                                | Participants                                                              | Intervention/management strategy <sup>a</sup>                                                                                                                                                  | Comparator                      | Outcome(s) <sup>b</sup>                           | SD&OA <sup>c</sup> | Oxford LoE <sup>d</sup> |
|--------------------------|-----------------------------------------|---------------------------------------------------------------------------|------------------------------------------------------------------------------------------------------------------------------------------------------------------------------------------------|---------------------------------|---------------------------------------------------|--------------------|-------------------------|
|                          |                                         |                                                                           |                                                                                                                                                                                                |                                 | Sleep Quality Index; Trunk Lateral Endurance Test |                    |                         |
| Maddali Bongi, 2021 (13) | Exercise (mouth)                        | Intervention: 25<br>Control: 22                                           | P: Home exercises for temporomandibular joint, mimic, masticatory and cervical spine muscles<br><br>C: Home exercises and combined physiotherapeutic procedures performed by a physiotherapist | Other SSc patients              | MHISS                                             | 11; W              | 3                       |
| Murphy, 2021 (14)        | Exercise (hand)                         | Intervention: 16<br>Control: 16                                           | P: Intensive occupational therapy and app-delivered home exercise.<br><br>C: App alone                                                                                                         | Other SSc patients              | QuickDASH                                         | 11; W              | 3                       |
| Pizzo, 2003 (15)         | Exercise (mouth)                        | Intervention: 10 selected among 35 patients with MMO≤30mm<br>Control: N/A | P: Mouth stretching exercise and oral augmentation exercise<br><br>C: N/A: intraindividual assessment                                                                                          | N/A; intraindividual assessment | -                                                 | 10; R              | 4                       |
| Pinto, 2011 (16)         | Exercise (general)                      | Intervention: 11<br>Control: N/A                                          | P: Supervised, treadmill, treadmill (aerobic), stretching exercise<br><br>C: N/A: intraindividual assessment                                                                                   | N/A; intraindividual assessment | -                                                 | 10; R              | 4                       |
| Defi, 2021 (17)          | Exercise (general)                      | Intervention: 11<br>Control: N/A                                          | P: High-intensity interval exercise (HIIT)<br><br>C: N/A: intraindividual assessment                                                                                                           | N/A; intraindividual assessment | -                                                 | 10; I              | 4                       |
| <b>Mental health</b>     |                                         |                                                                           |                                                                                                                                                                                                |                                 |                                                   |                    |                         |
| Yuen, 2012 (18)          | Patient education (mouth, oral hygiene) | Intervention: 26<br>Control: 22                                           | P: Orofacial exercise + multifaceted oral health intervention<br><br>C: Usual care                                                                                                             | Other SSc patients              | Oral aperture                                     | 11; I              | 2                       |
| Uras, 2019 (19)          | Patient education (mouth)               | Intervention: 31<br>Control: 32                                           | P: Face-to-face training + standard information programme (i.e., brochures, DVD)<br><br>C: Educational materials alone                                                                         | Other SSc patients              | Oral aperture                                     | 11; I              | 2                       |
| Cüzdan, 2021 (20)        | Patient education (mouth, oral hygiene) | Intervention: 28<br>Control: 28                                           | P: Orofacial exercise programme followed by oral hygiene care advice<br><br>C: Oral hygiene care advice followed by orofacial exercise programme                                               | Other SSc patients              | Oral aperture                                     | 11; I              | 2                       |
| Gokcen, 2021 (21)        | Patient education (hand)                | Intervention: 32<br>Control: 30                                           | P: Booklet, isometric hand exercise and self-administrated stretching<br><br>C: Booklet alone                                                                                                  | Other SSc patients              | DHI; HAMIS; Handgrip strength; HAQ-DI             | 11; I              | 2                       |
| Yuen, 2011 (22)          | Patient education (mouth, oral hygiene) | Intervention: 26<br>Control: 22                                           | P: Multi-faceted oral health intervention<br><br>C: Usual care                                                                                                                                 | Other SSc patients              | Löe-Silness gingival index                        | 11; W              | 3                       |
| Zanatta, 2017 (23)       | Patient education (general)             | Intervention: 10<br>Control: 10                                           | P: Informative meeting followed by occupational therapy<br><br>C: Informative meeting alone                                                                                                    | Other SSc patients              | HAQ-DI                                            | 10; R              | 3                       |
| Khanna, 2019 (24)        | Patient education (general)             | Intervention: 134<br>Control: 133                                         | P: Self-management website<br><br>C: Book                                                                                                                                                      | Other SSc patients              | PROMIS                                            | 11; W              | 3                       |
| Landim, 2020 (25)        | Patient education (hand)                | Intervention: 40<br>Control: 17                                           | P: Self-management programme composed of a booklet<br><br>C: No intervention                                                                                                                   | Other SSc patients              | CHFS; VAS (pain)                                  | 10; I              | 3                       |

| Author, Year                | Category                                     | Participants                                                        | Intervention/management strategy <sup>a</sup>                                                                                       | Comparator                      | Outcome(s) <sup>b</sup>           | SD&OA <sup>c</sup> | Oxford LoE <sup>d</sup> |
|-----------------------------|----------------------------------------------|---------------------------------------------------------------------|-------------------------------------------------------------------------------------------------------------------------------------|---------------------------------|-----------------------------------|--------------------|-------------------------|
| Samuelson, 2000 (26)        | Patient education (general, self-efficacy)   | Intervention: 6<br>Control: N/A                                     | P: Educational programme<br>C: N/A: intraindividual assessment                                                                      | N/A; intraindividual assessment | -                                 | 10; I              | 4                       |
| Brown, 2004 (27)            | Patient education (general)                  | Intervention: 5 with SSC, 5 with SLE<br>Control: N/A                | P: Educational programme<br>C: Educational programme                                                                                | SLE-patients                    | -                                 | 9; R               | 4                       |
| Poole, 2010 (28)            | Patient education (mouth, oral hygiene hand) | Intervention: 17<br>Control: N/A                                    | P: Customized intervention for dental hygiene and upper extremity's function<br>C: N/A: intraindividual assessment                  | N/A; intraindividual assessment | KT; Oral aperture; PHP            | 10; I              | 4                       |
| Poole, 2013 (29)            | Patient education (general, self-efficacy)   | Intervention: 62 (49 completers, 13 non-completers)<br>Control: N/A | P: Mail-delivered self-management programme<br>C: N/A: intraindividual assessment                                                   | N/A; intraindividual assessment | -                                 | 10; I              | 4                       |
| Poole, 2014 (30)            | Patient education (general, self-efficacy)   | Intervention: 16<br>Control: N/A                                    | P: Self-management website with 10 modules<br>C: N/A: intraindividual assessment                                                    | N/A; intraindividual assessment | -                                 | 10; R              | 4                       |
| Landim, 2019 (31)           | Patient education (hand)                     | Intervention: 22<br>Control: N/A                                    | P: Home based self-management programme that consisted of a booklet and information about SSC<br>C: N/A: intraindividual assessment | N/A; intraindividual assessment | CHFS; VAS (pain)                  | 10; R              | 4                       |
| <b>Diet and nutrition</b>   |                                              |                                                                     |                                                                                                                                     |                                 |                                   |                    |                         |
| Low, 2019 (32)              | Dietary therapy (probiotics)                 | Intervention: 19<br>Control: 21                                     | P: Probiotics<br>C: Placebo                                                                                                         | Other SSC patients              | GIT-score                         | 11; I              | 2                       |
| Marighela, 2019 (33)        | Dietary therapy (probiotics)                 | Intervention: 37<br>Control: 36                                     | P: Probiotics<br>C: Placebo                                                                                                         | Other SSC patients              | GIT-score; Th-17 cells            | 11; W              | 3                       |
| Frech, 2011 (34)            | Dietary therapy (probiotics)                 | Intervention: 10<br>Control: N/A                                    | P: Probiotics<br>C: N/A: intraindividual assessment                                                                                 | N/A; intraindividual assessment | GIT-score                         | 10; I              | 4                       |
| Ortiz-Santamaria, 2014 (35) | Dietary therapy (nutrition)                  | Intervention: 9<br>Control: N/A                                     | P: Individually adapted nutritional intervention<br>C: N/A: intraindividual assessment                                              | N/A; intraindividual assessment | BMI; Energy intake; SF-36; Weight | 10; I              | 4                       |
| Doerfler, 2017 (36)         | Dietary therapy (nutrition)                  | Intervention: 18<br>Control: N/A                                    | P: Medical nutrition therapy<br>C: N/A: intraindividual assessment                                                                  | N/A; intraindividual assessment | abPGSSGA; DXA                     | 10; I              | 4                       |

<sup>a</sup>P: Intervention/management strategy applied to population under investigation; C: Intervention/management strategy applied to participants in the comparator group. <sup>b</sup>Outcomes from the studies cited in the systematic review: 6MWD: Six minute walk distance; abPGSSGA: abridged scored Patient-Generated Subjective Global Assessment; BMI: Body Mass Index; CHFS: Cochin Hand Function Scale; COPM: Canadian Occupational Performance Measure; CVC: Cutaneous vascular conductance; DHI: Duruoz Hand Index; DXA: Dual energy x-ray absorptiometry; FISI: Fecal Incontinence Severity Index; GIT-score: University of California, Los Angeles Scleroderma Clinical Trial Consortium Gastrointestinal Tract Instrument; HAMIS: Hand Mobility in Scleroderma; HAQ-DI: Health Assessment Questionnaire-Disability Index; KT: Keitel Function Test; MHISS: Mouth Handicap in Systemic Sclerosis scale; PHP: Patient Hygiene Performance index; PROMIS: Patient Reported Outcomes Measurement Information System; QuickDASH: the shortened disabilities of the arm, shoulder and hand questionnaire; ROM: range of motion; SF-36: the 36-item short form health survey; STAI: State-Trait Anxiety Inventory; VAS: visual analogue scale; VO2max: maximum oxygen consumption. <sup>c</sup>Study design and overall appraisal (adapted from the Joanna Briggs Institute Manual for Evidence Synthesis (37)). <sup>d</sup>LoE: Levels of evidence according to the Oxford Centre for Evidence-Based Medicine (38).

| Notation | Study design                     |
|----------|----------------------------------|
| 1        | Analytical cross-sectional study |

|    |                                                  |
|----|--------------------------------------------------|
| 2  | Case-control study                               |
| 3  | Case report                                      |
| 4  | Case series                                      |
| 5  | Cohort study                                     |
| 6  | Diagnostic test accuracy study                   |
| 7  | Economic evaluation                              |
| 8  | Prevalence study                                 |
| 9  | Qualitative research                             |
| 10 | Quasi-experimental study                         |
| 11 | Randomised controlled trial                      |
| 12 | Meta-analysis, with or without systematic review |

| Notation | Overall appraisal |
|----------|-------------------|
| R        | Robust            |
| I        | Intermediate      |
| W        | Weak              |

## References

1. Stefanantoni K, Sciarra I, Iannace N, Vasile M, Caucci M, Sili Scavalli A, et al. Occupational therapy integrated with a self-administered stretching program on systemic sclerosis patients with hand involvement. *Clin Exp Rheumatol*. 2016;34 Suppl 100(5):157-61.
2. Rannou F, Boutron I, Mouthon L, Sanchez K, Tiffreau V, Hachulla E, et al. Personalized Physical Therapy Versus Usual Care for Patients With Systemic Sclerosis: A Randomized Controlled Trial. *Arthritis care & research*. 2017;69(7):1050-9.
3. Gregory WJ, Wilkinson J, Herrick AL. A randomised controlled trial of wax baths as an additive therapy to hand exercises in patients with systemic sclerosis. *Physiotherapy*. 2019;105(3):370-7.
4. Filippetti M, Cazzoletti L, Zamboni F, Ferrari P, Caimmi C, Smania N, et al. Effect of a tailored home-based exercise program in patients with systemic sclerosis: A randomized controlled trial. *Scandinavian Journal of Medicine & Science in Sports*. 2020;30(9):1675-84.
5. Mugii N, Hasegawa M, Matsushita T, Kondo M, Orito H, Yanaba K, et al. The efficacy of self-administered stretching for finger joint motion in Japanese patients with systemic sclerosis. *Journal of Rheumatology*. 2006;33(8):1586-92.
6. Oliveira NC, dos Santos Sabbag LM, de Sá Pinto AL, Borges CL, Lima FR. Aerobic exercise is safe and effective in systemic sclerosis. *Int J Sports Med*. 2009;30(10):728-32.
7. Piga M, Tradori I, Pani D, Barabino G, Dessi A, Raffo L, et al. Telemedicine applied to kinesiotherapy for hand dysfunction in patients with systemic sclerosis and rheumatoid arthritis: recovery of movement and telemonitoring technology. *Journal of Rheumatology*. 2014;41(7):1324-33.
8. Lima TR, Guimaraes FS, Carvalho MN, Sousa TL, Menezes SL, Lopes AJ. Lower limb muscle strength is associated with functional performance and quality of life in patients with systemic sclerosis. *Brazilian Journal of Physical Therapy*. 2015;19(2):129-36.
9. Azar M, Rice DB, Kwakkenbos L, Carrier ME, Shrier I, Bartlett SJ, et al. Exercise habits and factors associated with exercise in systemic sclerosis: a Scleroderma Patient-centered Intervention Network (SPIN) cohort study. *Disability & Rehabilitation*. 2018;40(17):1997-2003.
10. Mitropoulos A, Gumber A, Crank H, Akil M, Klonizakis M. The effects of upper and lower limb exercise on the microvascular reactivity in limited cutaneous systemic sclerosis patients. *Arthritis Res Ther*. 2018;20(1):112.
11. Mitropoulos A, Gumber A, Akil M, Klonizakis M. Exploring the microcirculatory effects of an exercise programme including aerobic and resistance training in people with limited cutaneous systemic sclerosis. *Microvasc Res*. 2019;125:103887.
12. Cetin SY, Calik BB, Ayan A. Investigation of the effectiveness of Tai Chi exercise program in patients with scleroderma: A randomized controlled study. *Complementary Therapies in Clinical Practice*. 2020;40:101181.

13. Maddali Bongi S, Passalacqua M, Landi G, Mikhaylova S, Tofani L, Del Rosso A, et al. Rehabilitation of the face and temporomandibular joint in systemic sclerosis. *Therapeutic Advances in Musculoskeletal Disease*. 2021;13.
14. Murphy SL, Barber M, Huang S, Sabbagh M, Cutter G, Khanna D. Intensive and App-Delivered Occupational Therapy to Improve Upper Extremity Function in Early Diffuse Cutaneous Systemic Sclerosis: A Pilot Two-Arm Trial. *Rheumatology*. 2021;11:11.
15. Pizzo G, Scardina GA, Messina P. Effects of a nonsurgical exercise program on the decreased mouth opening in patients with systemic scleroderma. *Clinical Oral Investigations*. 2003;7(3):175-8.
16. Pinto AL, Oliveira NC, Gualano B, Christmann RB, Painelli VS, Artioli GG, et al. Efficacy and safety of concurrent training in systemic sclerosis. *Journal of Strength & Conditioning Research*. 2011;25(5):1423-8.
17. Defi IR, Gultom C, Chorman MJ, Jennie J. High-intensity interval training can improve hand grip strength, inspiratory muscle, and quality of life in systemic sclerosis subjects. *Reumatologia*. 2021;59(2):98-103.
18. Yuen HK, Marlow NM, Reed SG, Mahoney S, Summerlin LM, Leite R, et al. Effect of orofacial exercises on oral aperture in adults with systemic sclerosis. *Disability & Rehabilitation*. 2012;34(1):84-9.
19. Uras C, Mastroeni S, Tabolli S, Masini C, Pallotta S, Teofoli P, et al. A comparison between two educational methods in the rehabilitation of the microstomia in systemic sclerosis: a randomized controlled trial. *Clinical Rehabilitation*. 2019;33(11):1747-56.
20. Cüzdan N, Türk İ, Çiftçi V, Arslan D, Doğan MC, Ünal İ. The effect of a home-based orofacial exercise program on oral aperture of patients with systemic sclerosis: A single-blind prospective randomized controlled trial. *Archives of Rheumatology*. 2021;36(2):176-84.
21. Gokcen N, Badak SO, Sarpel T, Sertdemir Y, Erken E. The Efficacy of a Home-Based, Self-Administered Hand Exercise Program for Patients With Systemic Sclerosis: A Randomized Controlled, Evaluator-Blind, Clinical Trial. *JCR: Journal of Clinical Rheumatology*. 2021;6:06.
22. Yuen HK, Weng Y, Bandyopadhyay D, Reed SG, Leite RS, Silver RM. Effect of a multi-faceted intervention on gingival health among adults with systemic sclerosis. *Clinical & Experimental Rheumatology*. 2011;29(2):S26-32.
23. Zanatta E, Rodeghiero F, Pigatto E, Galozzi P, Polito P, Favaro M, et al. Long-term improvement in activities of daily living in women with systemic sclerosis attending occupational therapy. *British Journal of Occupational Therapy*. 2017;80(7):417-22.
24. Khanna D, Serrano J, Berrocal VJ, Silver RM, Cuencas P, Newbill SL, et al. Randomized Controlled Trial to Evaluate an Internet-Based Self-Management Program in Systemic Sclerosis. *Arthritis care & research*. 2019;71(3):435-47.
25. Landim S, Bertolo M, Del Rio A, Sachetto Z, Gaino J, Poole J, et al. Sustained efficacy of a concise self-management programme for hands in systemic sclerosis: a longitudinal case-control observational study. *Rheumatology*. 2020;59(11):3330-9.
26. Samuelson UK, Ahlmen EM. Development and evaluation of a patient education program for persons with systemic sclerosis (scleroderma). *Arthritis Care & Research*. 2000;13(3):141-8.
27. Brown SJ, Somerset ME, McCabe CS, McHugh NJ. The impact of group education on participants' management of their disease in lupus and scleroderma. *Musculoskeletal Care*. 2004;2(4):207-17.
28. Poole J, Conte C, Brewer C, Good CC, Perella D, Rossie KM, et al. Oral hygiene in scleroderma: The effectiveness of a multi-disciplinary intervention program. *Disability & Rehabilitation*. 2010;32(5):379-84.
29. Poole JL, Skipper B, Mendelson C. Evaluation of a mail-delivered, print-format, self-management program for persons with systemic sclerosis. *Clinical Rheumatology*. 2013;32(9):1393-8.
30. Poole JL, Mendelson C, Skipper B, Khanna D. Taking charge of systemic sclerosis: a pilot study to assess the effectiveness of an internet self-management program. *Arthritis care & research*. 2014;66(5):778-82.
31. Landim SF, Bertolo MB, Marcatto de Abreu MF, Del Rio AP, Mazon CC, Marques-Neto JF, et al. The evaluation of a home-based program for hands in patients with systemic sclerosis. *Journal of Hand Therapy*. 2019;32(3):313-21.
32. Low AHL, Teng GG, Pettersson S, de Sessions PF, Ho EXP, Fan Q, et al. A double-blind randomized placebo-controlled trial of probiotics in systemic sclerosis associated gastrointestinal disease. *Seminars in Arthritis & Rheumatism*. 2019;49(3):411-9.
33. Marighela TF, Arismendi MI, Marvulle V, Brunialti MKC, Salomao R, Kayser C. Effect of probiotics on gastrointestinal symptoms and immune parameters in systemic sclerosis: a randomized placebo-controlled trial. *Rheumatology*. 2019;58(11):1985-90.
34. Frech TM, Khanna D, Maranian P, Frech EJ, Sawitzke AD, Murtaugh MA. Probiotics for the treatment of systemic sclerosis-associated gastrointestinal bloating/ distention. *Clin Exp Rheumatol*. 2011;29(2 Suppl 65):S22-5.

35. Ortiz-Santamaria V, Puig C, Soldevilla C, Barata A, Cuquet J, Recasens A. Nutritional support in patients with systemic sclerosis. *Reumatologia Clinica*. 2014;10(5):283-7.
36. Doerfler B, Allen TS, Southwood C, Brenner D, Hirano I, Sheean P. Medical Nutrition Therapy for Patients With Advanced Systemic Sclerosis (MNT PASS): A Pilot Intervention Study. *Jpen: Journal of Parenteral & Enteral Nutrition*. 2017;41(4):678-84.
37. (Editor) AE, (Editor) MZ. JBI Manual for Evidence Synthesis JBI2020 [Available from: <https://synthesismanual.jbi.global>].
38. Howick J, Chalmers I, Glasziou P, Greenhalgh T, Heneghan C, Liberati, et al. The Oxford Levels of Evidence 2 2011 [Available from: <https://www.cebm.ox.ac.uk/resources/levels-of-evidence/ocebmllevels-of-evidence>].
